# Supplementary material for: Surfactant modification of banana trunk as low-cost adsorbents and their high benzene adsorptive removal performance from aqueous solution
Source: Royal Society of Chemistry journal article supplement (doi:10.1039/c6ra00911e), 2016-01-01

## Supporting Information

SI 1 FTIR spectrum of (a) M-CTAB-BT, (b) M-SDS-BT, (c) M-P123-BT, and (d) M-TX100-BT.

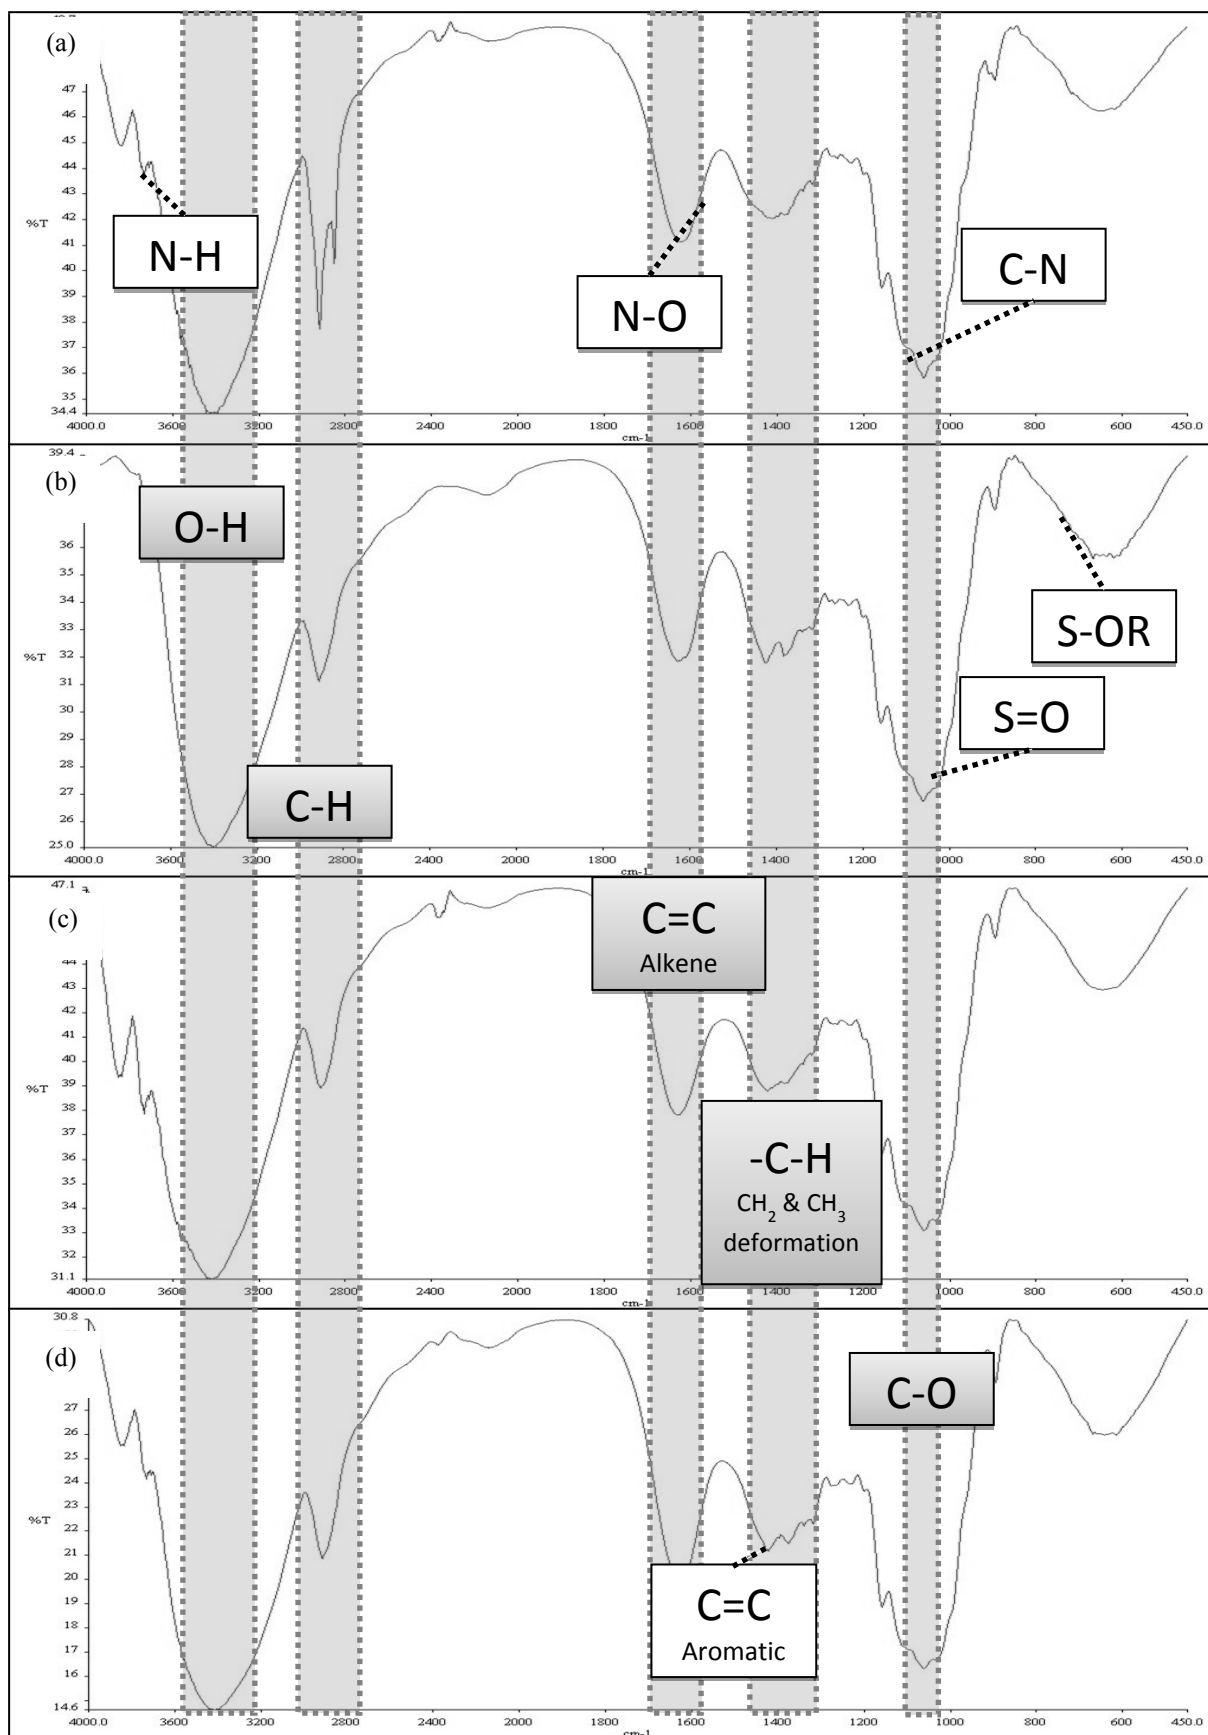

SI 2 A XPS wide scan of (a) Raw-BT and (b) M-TX100-BT.

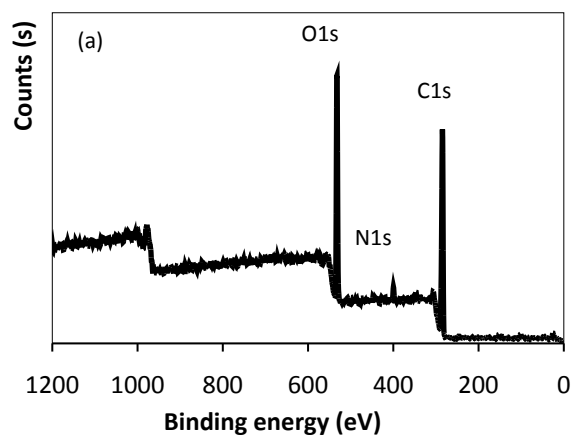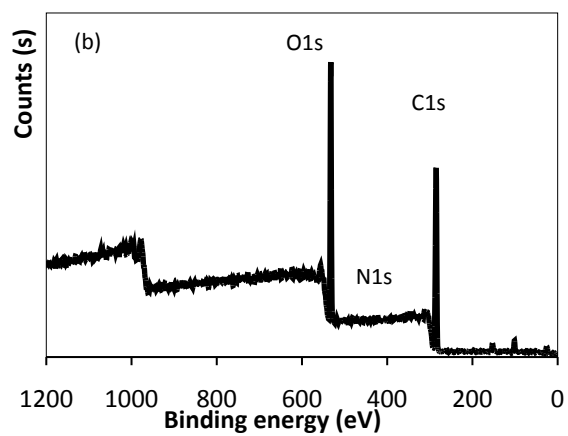

SI 3 Effect of pH on benzene adsorption capacity of M-TX100-BT. Experimental conditions: initial benzene concentration ( $C_0$ ), 2.5 mmol/L; contact time, 24 hours; temperature, 303 K; and adsorbent dosage (S/L), 1.0 mg/mL.

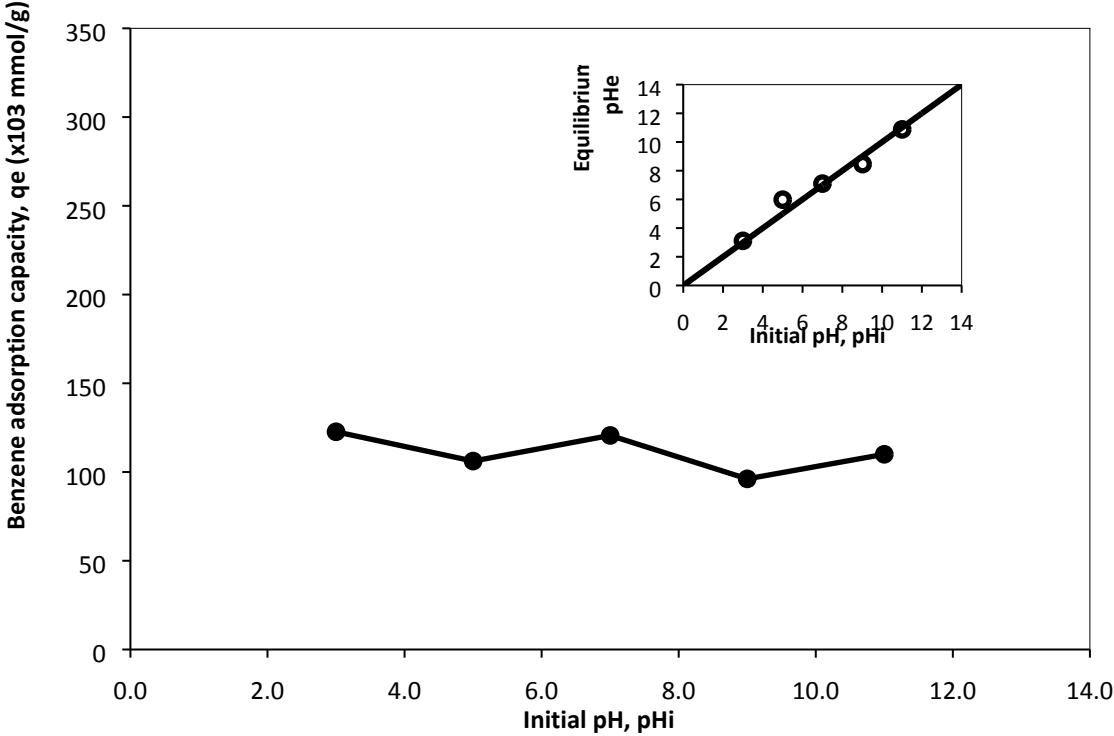

SI 4 Isotherm modelling of benzene adsorption onto M-TX100-BT: (a) Langmuir and (b) Temkin isotherm models.

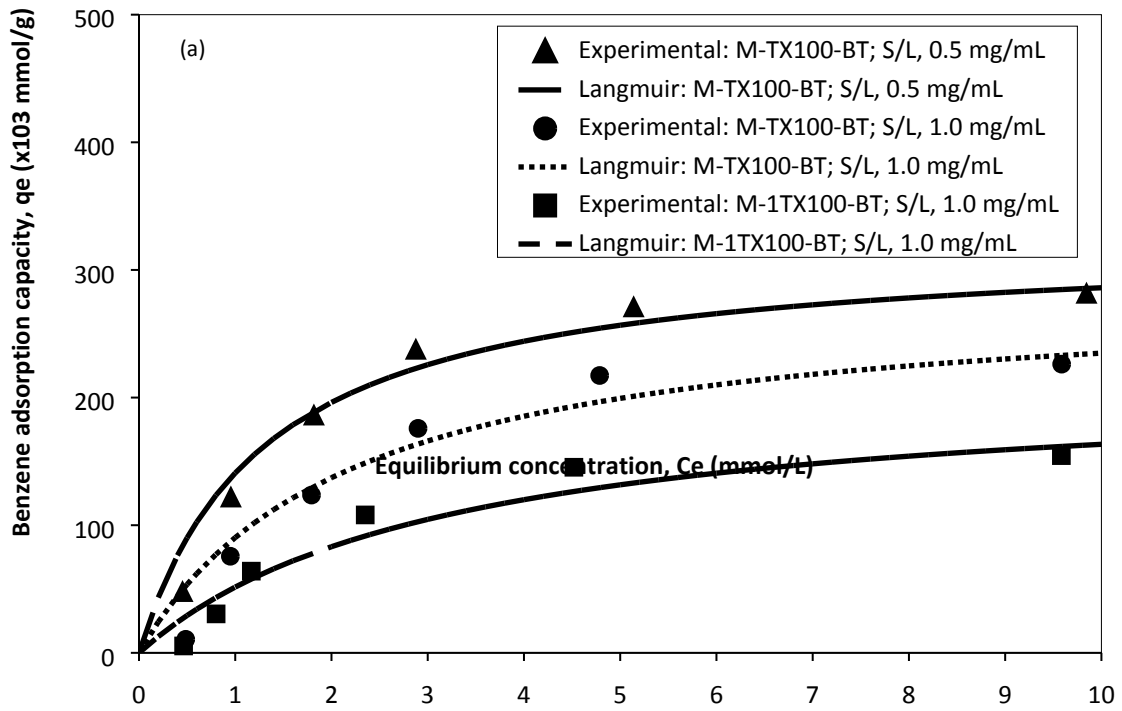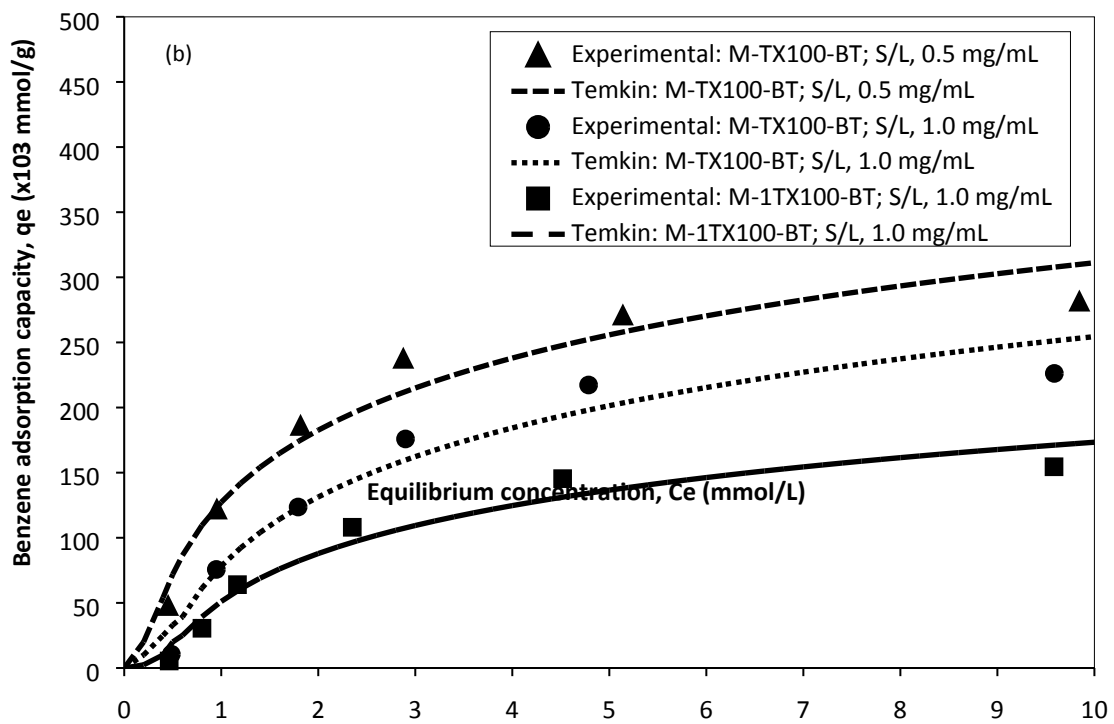

SI 5 Intraparticle/Weber-Morris plot for benzene adsorption by M-TX100-BT at different reaction temperatures.

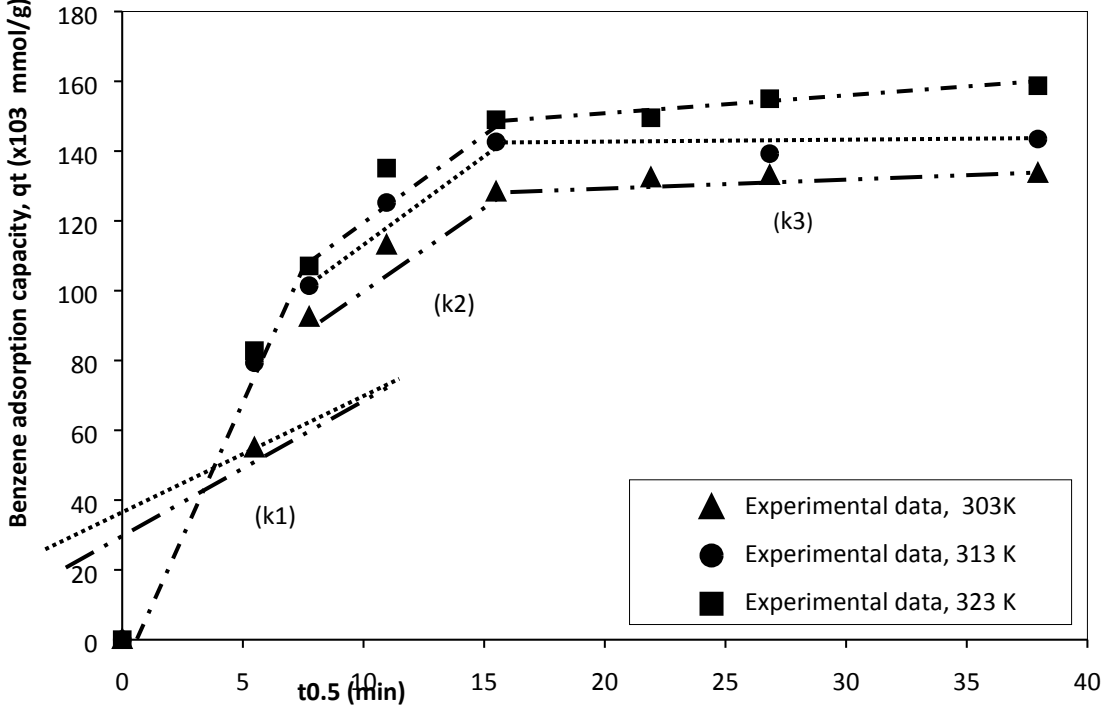

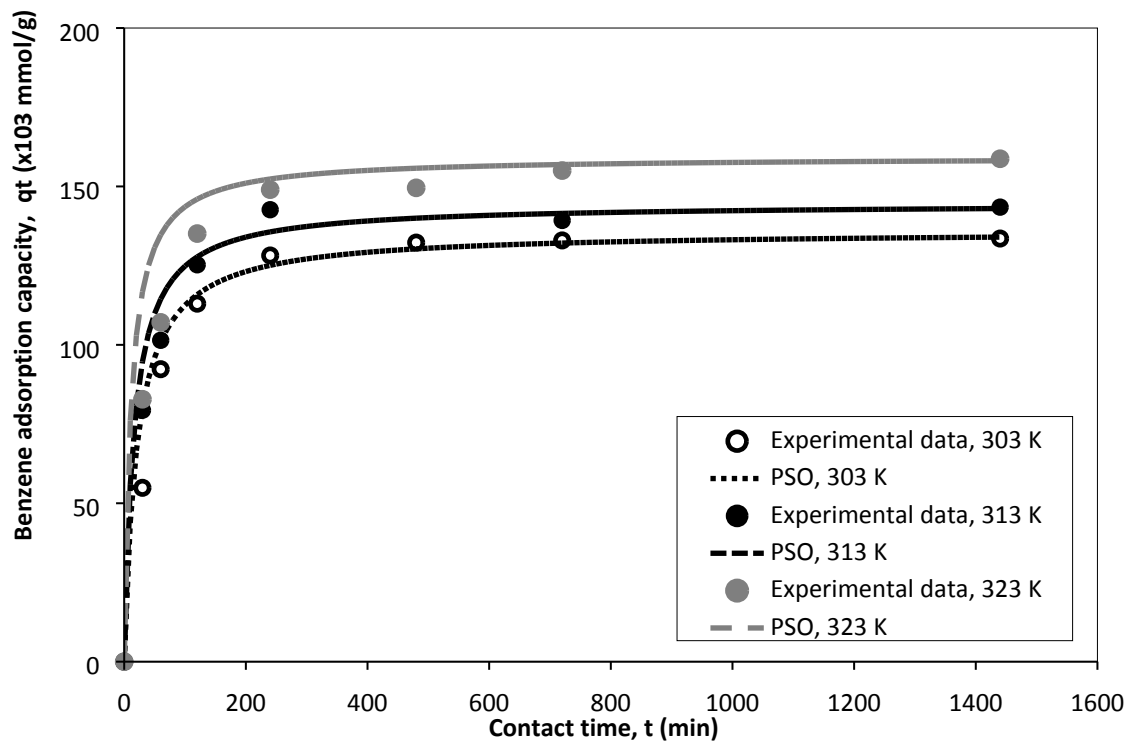

Supplement: c6ra00911e1.pdf [file c6ra00911e1.pdf]
